# 1 Title Page:

2 MQF and buffered MQF: Quotient filters for efficient storage of k-mers with their counts and

3 metadata

4 ● Moustafa Shokrof

5 ○ Department of Computer Science, University of California, Davis, CA, USA

6 ● C. Titus Brown:

7 ○ Department of Population Health and Reproduction, School of Veterinary

8 Medicine, University of California, Davis, CA, USA

9 ● Tamer A. Mansour (corresponding author)

10 ○ Department of Clinical Pathology, School of Medicine, University of Mansoura,

11 Mansoura, Egypt

12 ○ Department of Population Health and Reproduction, School of Veterinary

13 Medicine, University of California, Davis, CA, USA

14

15

16

17

18

19

20

21

22

23

24

## 25 Abstract

### 26 **Background**

27 Specialized data structures are required for online algorithms to efficiently handle large  
28 sequencing datasets. The counting quotient filter (CQF), a compact hashtable, can efficiently  
29 store k-mers with a skewed distribution.

### 30 **Result**

31 Here, we present the mixed-counters quotient filter (MQF) as a new variant of the CQF with  
32 novel counting and labeling systems. The new counting system adapts to a wider range of data  
33 distributions for increased space efficiency and is faster than the CQF for insertions and queries  
34 in most of the tested scenarios. A buffered version of the MQF can offload storage to disk,  
35 trading speed of insertions and queries for a significant memory reduction. The labeling system  
36 provides a flexible framework for assigning labels to member items while maintaining good data  
37 locality and a concise memory representation. These labels serve as a minimal perfect hash  
38 function but are ~10 fold faster than BBhash, with no need to re-analyze the original data for  
39 further insertions or deletions.

### 40 **Conclusion**

41 The MQF is a flexible and efficient data structure that extends our ability to work with high  
42 throughput sequencing data.

43

### 44 **Keywords**

45 Compact hash tables, k-mers, debruijn graphs, NGS, inexact data structures.

46

## 47 Background

48 Online algorithms effectively support streaming analysis of large data sets, which is  
49 important for analyzing data sets with large volume and high velocity(1). Approximate data  
50 structures are commonly used in online algorithms to provide better average space and time  
51 efficiency (2). For example, the Bloom filter supports approximate set membership queries with  
52 a predefined false positive rate (FPR) (3). The count-min sketch (CMS) is similar to Bloom filters  
53 and can be used to count items with a tunable rate of overestimation. However, there are a  
54 number of problems with Bloom filters and the CMS - in particular, they do not support data  
55 locality.

56 The Counting Quotient Filter (CQF) is a more efficient data structure that serves similar  
57 purposes with better efficiency for skewed distributions and much better data locality(4). The  
58 CQF is a recent variant of quotient filters that tracks the count of its items using a variable size  
59 counter. As a compact hashtable, CQF can perform in either probabilistic or exact modes and  
60 supports deletes, merges, and resizing.

61 Analysis of k-mers in biological sequencing data sets is an ongoing challenge(5). K-mers  
62 in raw sequencing data often have a high Zipfian distribution, and the CQF was built to minimize  
63 memory requirements for counting such items. However, this advantage deteriorates in  
64 applications that require frequent random access to the data structure, and where the k-mer  
65 count distribution may change in response to different sampling approaches, library preparation  
66 and/or sequencing technologies. For example, k-mer frequency across 1000s of RNAseq  
67 experiments shows different patterns of abundant k-mers (6).

68 Data structures like CMS (7) and CQF (4) also do not natively support associating k-  
69 mers with multiple values, which can be useful for coloring in De Bruijn graphs as well as other  
70 features (8). Classical hash tables are designed to associate their keys with a generic data type  
71 but they are expensive memory-wise (9). Minimal Perfect Hash Functions (MPHF) can provide

72 a more compact solution by mapping each k-mer into a unique integer. These integers can then  
73 be used as indices for the k-mers to label them in other data structures (10). An implementation  
74 capable of handling large scale datasets with fast performance requires ~3 bits per element  
75 (11). However, such a concise representation comes with a high false-positive rate on queries  
76 for non-existent items. Moreover, unlike hashtables, MPHf does not support insertions or  
77 deletions thus any change in the k-mer set would require rehashing of the original dataset.

78 In this paper, we introduce the mixed-counters quotient filter (MQF), a modified version  
79 of the CQF with a new encoding scheme and labeling system supporting high data locality. We  
80 further show how Buffered MQF can be used to scale MQF to solid-state disks. We compare  
81 between MQF and the CQF, CMS, and MPHf data structures regarding memory efficiency,  
82 speed performance, and applicability to specific data analysis challenges. We further do a direct  
83 comparison of the CMS to MQF in the khmer software package for sequencing data analysis, to  
84 showcase the benefits of MQF is in real world applications.

85

86

87

88

89

90

91

## 92 Results

93 **MQF has a lower load factor than CQF**

94 The load factor is defined as the actual space utilized divided by the total space  
95 assigned for the data structure, and is an important measure of data structure performance. To  
96 compare load factors between the CQF and MQF data structures, instances of both structures  
97 were created using the same number of slots ( $2^{27}$ ). Chunks of items from five datasets with  
98 different distributions of item frequencies were inserted iteratively to both data-structures while  
99 recording the load factor after the insertion of each chunk. The experiments stopped when  
100 MQF's load factor reached 90%. MQF had lower loading factors for all tested datasets but the  
101 difference was minimal for the dataset with the highest Zipfian distribution ( $Z=5$ ). The lower the  
102 tested Zipfian distribution the lower the loading factor of MQF (Figure 1). A lower loading factor  
103 enabled MQF to accommodate > 30% of the CQF capacity from a dataset of real k-mers and to  
104 exceed the double CQF capacity with uniform distribution (Figure 1 and supplementary table 1).  
105

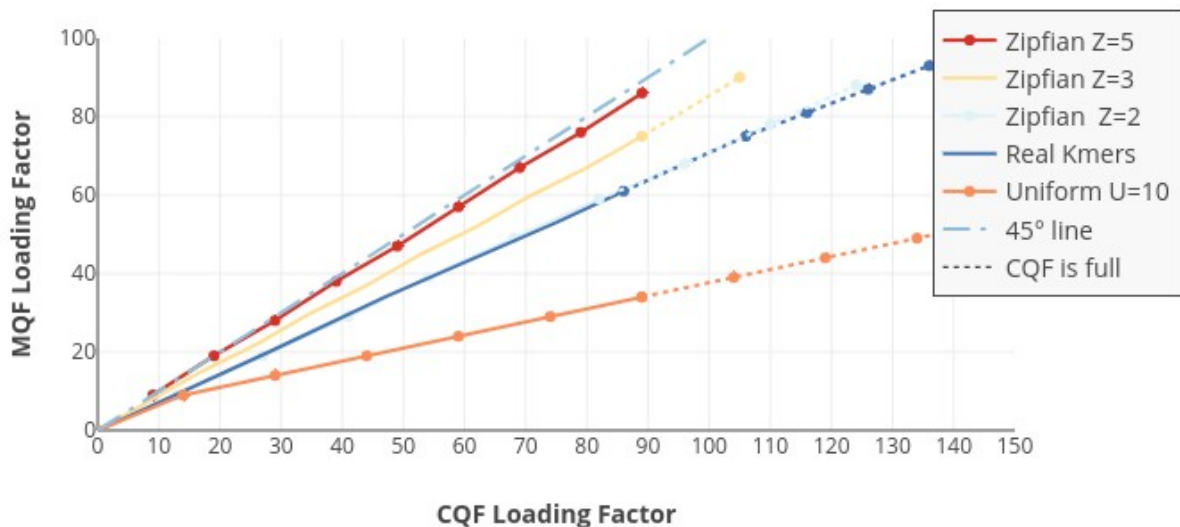

106  
107 **Figure 1: MQF has a lower load factor compared to CQF.** Chunks of items, from different  
108 distributions of item's frequencies, were inserted iteratively to matching CQF and MQF

109 structures. MQF had lower loading factors for all tested datasets with better performance with  
110 more uniform distributions (The further from the 45° line the better the MQF).

111

## 112 **MQF is usually more memory efficient than CQF**

113 Progressively increasing numbers of items were sampled from the real and Zipfian-  
114 simulated datasets. The smallest CQF and MQF to store the same number of items from each  
115 dataset were created. To do that, the  $q$  parameter of CQF versus the  $q$  and  $F_{\text{size}}$  parameters of  
116 MQF were calculated empirically. MQF was more memory efficient for real k-mers and Zipfian-  
117 simulated distributions with low coefficients in 75% of the cases (Figure 2). The tuning of the  
118  $F_{\text{size}}$  enabled MQF to grow in size gradually compared to CQF which has to double in size to fit  
119 the minimal increase in items beyond the capacity of a given  $q$  value (Supplementary Figure 1).

120

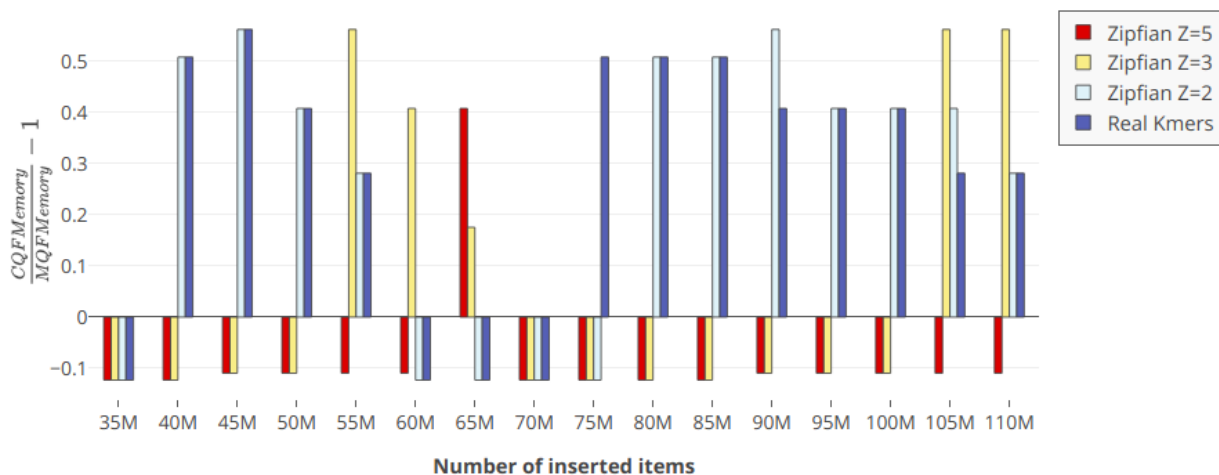

121

122 **Figure 2: Memory consumption comparison between CQF and MQF.** The graph compares  
123 the memory consumption of the smallest CQF and MQF that fits different datasets. The bigger  
124 the value on the y-axes, the more memory the MQF saved.

125

126 **MQF is faster than CQF and low-FPR CMS** The in-memory and buffered MQFs were  
 127 evaluated for speed of insertion and query in comparison to three in-memory counting  
 128 structures: CQF, the original CMS (12), and khmer's CMS (13). To test the effect of FPR on the  
 129 performance, the experiment was repeated for 4 different FPRs (0.1, 0.01, 0.001, 0.0001). All  
 130 tested structures were constructed to have approximately the same memory space except for  
 131 buffered MQF which used only one-third of this memory for buffering while the full-size filter is  
 132 on the disk. MQF is guaranteed to hold the same number of items as a CQF having the same  
 133 number of slots. The number of slots in CQF was chosen so that the load factor was more than  
 134 85% and the MQFs were created with an equal number of slots. Items were sampled for  
 135 insertion from the real and Zipfian-simulated datasets. After finishing the insertion, to assess the  
 136 query rate, 5M items from the same distribution as the insertion datasets were queried. Half of  
 137 the query items didn't exist in the insertion datasets.

138 MQF has a faster insertion and query rates compared to CQF with minimal, if any, effect  
 139 of the FPR on either structure. The performance of CMS is better with higher FPR and Khmer's  
 140 implementation of CMS doubles the query rate of the original one. However, MQF is always  
 141 faster than both CMS unless the FPR is more than 0.01 (Figure 3).

142

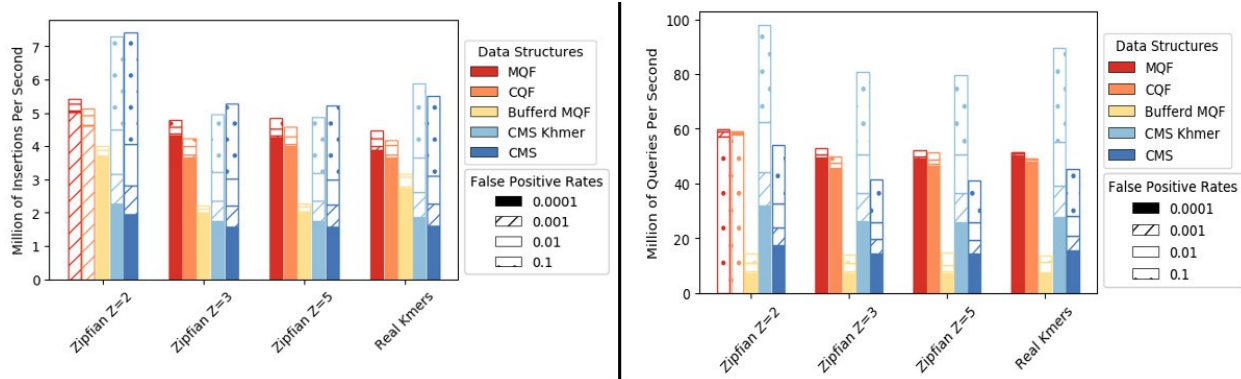

143

144 **Figure 3: Performance comparison of four data-structures: MQF, CQF, buffered MQF,**

145 Khmer implementation of CMS, and Original implementation of CMS: Insertions rate (left panel)  
146 and query rate (right panel).

147

## 148 **MQF outperforms CMS in real-world problems**

149 Khmer is a software package deploying a new implementation of CMS for k-mer  
150 counting, error trimming and digital normalization (13). To test MQF in real-life applications, we  
151 assessed the performance of the Khmer software package using CMS (13) versus our new  
152 implementation using MQF (<https://github.com/dib-lab/khmer/tree/MQFIntegration2>). A real RNA  
153 seq dataset with 51 million reads from the Genome in a Bottle project (14) was used for error  
154 trimming and digital normalization; two real-world applications that involve both k-mer insertions  
155 and queries. An exact MQF was used to create a benchmark for the approximate data  
156 structures. It took 5Gb RAM to create the data structure and 45 and 43 minutes to perform  
157 trimming and digital normalization respectively. The optimal memory for MQF and the optimal  
158 number of hash functions for CMS were calculated to achieve the specified false-positive rates.  
159 The CMS was constructed with the same size as the corresponding MQFs. The CMS and MQF  
160 versions of Khmer were compared regarding the speed and accuracy (Table 1).

161

162

163

164

165

166

167

168

169



170

171

| FPR       | Memory in GB | Error Trimming |     |                          |         | Digital normalization |     |                     |        | Error Bound in CMS | Hash func. In CMS |
|-----------|--------------|----------------|-----|--------------------------|---------|-----------------------|-----|---------------------|--------|--------------------|-------------------|
|           |              | Time in Min.   |     | Missed reads with Errors |         | Time in Min.          |     | Reads kept by Error |        |                    |                   |
|           |              | MQF            | CMS | MQF                      | CMS     | MQF                   | CMS | MQF                 | CMS    |                    |                   |
| $10^{-1}$ | 1.8          | 42             | 39  | 11011                    | 445817* | 39                    | 37  | 3253                | 31143* | 13,11              | 3                 |
| $10^{-2}$ | 2.6          | 43             | 48  | 1304                     | 404354  | 41                    | 45  | 416                 | 24987  | 14                 | 5                 |
| $10^{-3}$ | 3.4          | 44             | 61  | 130                      | 311464  | 42                    | 54  | 58                  | 21000  | 15                 | 7                 |
| $10^{-4}$ | 4.5          | 44             | 75  | 3                        | 292746  | 42                    | 68  | 4                   | 18449  | 16                 | 10                |
| Exact     | 5            | 45             | -   | 0                        | -       | 43                    | -   | 0                   | -      | -                  | -                 |

172 **Table 1: Khmer performance in error trimming and digital normalization using MQF and**  
 173 **CMS.** \*Percentages of wrong decisions made by CMS at FPR = 0.1 in error trimming and digital  
 174 normalization are 0.8% and 0.13% of the total number of decisions versus 0.02% and 0.01%  
 175 made by MQF.

## 176 MQF is faster than MPHf

177 MPHf is constructed by default to fit the input k-mers while MQF would have different  
 178 load factor that might affect its performance. To address this question, four growing subsets of  
 179 real k-mers were inserted into MQFs of size 255 MB to achieve 60%, 70%, 80%, and 90% load  
 180 factors. MPHfs were constructed with sizes ranging from 15 to 22 MB to fit the four datasets. All  
 181 data structures were queried with 35M existing k-mers and the query times were reported. The  
 182 MQFs were ~10 folds faster than the MPHfs. The query time of the MQF was invariable over  
 183 the different load factors (Supplementary Figure 2).

## 184 Discussion

185 MQF is a new variant of counting quotient filters with novel counting and labeling  
 186 systems. The new counting system increases memory efficiency as well as the speed of  
 187 insertions and queries for a wide range of data distributions. The labeling system provides a

188 flexible framework for labeling the member items while maintaining good data locality and a  
189 concise memory representation.

190

191 MQF is built on the foundation of CQF. MQF has the same ability to behave as an exact  
192 or approximate membership query data structure while tracking the count of its members. The  
193 insertion/query algorithm developed for CQF enables this family of compact hashtables to  
194 perform fast under high load factor (up to 95%) (4). CQFs are designed to work best for data  
195 from high Zipfian distributions. However, previous k-mer spectral analysis of RNAseq datasets  
196 showed substantial deviations from a Zipfian distribution in thousands of samples(6). Such  
197 variations in distribution are expected given the variety of biosamples, the broad spectrum of  
198 sequencing techniques, and different approaches to data preprocessing.

199 MQF implements a new counting system that allows the data structure to work efficiently  
200 with a broader range of data distributions. The counting system adopts a simple encoding  
201 scheme that uses a fixed small space alone or with a variable number of the filter's slots to  
202 record the count of member items (Figure 4). Items with small counts utilize the small fixed-size  
203 counters. Therefore, slots, used to be consumed by CQF as counters for these items, are freed  
204 to accommodate more items in the filter. The MQF's load factor grows slower than CQF with all  
205 distributions except the extreme Zipfian case ( $Z=5$ ) where the load factor is almost the same  
206 (Figure 1). This is why the memory requirement for MQFs is usually smaller compared to CQFs  
207 under most distributions despite the extra space taken by the fixed counters (Figure 2). The size  
208 of the fixed-size counter is constant independent from the slot size, therefore the memory  
209 requirement for this counter will be trivial with big slots for smaller FPRs and almost negligible in  
210 the exact mode. However, this fixed-size counter comes with an additional advantage for MQF.  
211 Tuning the size of the fixed-size counter enables the filter to accommodate more items with a  
212 slightly larger slot size. This allows the memory requirement for MQF to grow gradually instead  
213 of the obligatory size doubling seen in CQF (Figure 2 and Supplementary Figure 1).

214           Moreover, the new counting scheme in MQF is simplified compared to that of the CQF.  
215   MQF defines the required memory for any item based solely on its count. Therefore, an  
216   accurate estimation of the required memory for any dataset can be done extremely quickly by  
217   an approximate estimation of data distribution(15)(16). This is unlike CQF which needs to add a  
218   safety margin to account for the special slots used by the counter encoding technique since it is  
219   impossible to estimate the number of these slots.

220

221           Regarding the speed of insertions and queries, MQF is slightly faster than CQF (Figure  
222   3). This could be explained partially by the lower load factor of MQF and partially by the  
223   simplicity of the coding/decoding scheme of its counting system. Both MQF and CQF are faster  
224   than CMS unless the target FPR is really high (e.g.  $FPR > 0.1$ ) (Figure 3). CMS controls its FPR  
225   by increasing the number of its hash tables requiring more time for insertions and queries to  
226   happen. In comparison, quotient filters use always one function but with more hash-bits to  
227   control the FPR, with a minimal effect on the insertion/query performance (Figure 3). With high  
228   FPR (e.g.  $FPR = 0.1$ ), CMS uses fewer hash functions and is better performing than MQF. A  
229   quotient filter or CMS with a  $FPR = \delta$  should have the same probability of item collisions.  
230   However, the quotient filter will be more accurate because CMS has another type of error with a  
231   probability  $(1-\delta)$ , which incorrectly increases the count of its items. This error is a “bounded  
232   error” with a threshold that inversely correlates with the width of the CMS(12). In another sense,  
233   some applications might deploy CMS with a smaller table’s width to be more memory efficient  
234   than MQF if the application can tolerate a high bounded error.

235           Buffered MQF can trade some of the speed of insertions and queries for significant  
236   memory reduction by storing data on disk. The buffered structure was developed to make use of  
237   the optimized sequential read and write on SSD. The buffered structure processes most of the  
238   insertion operations using the bufferMQF that resides on memory, thereby limiting the number  
239   of access requests to the MQF stored on the SSD hard drive. Sequential disk access happens

240 when the bufferMQF needs to be merged to the disk. This approach is very efficient for  
241 insertions but not for random queries which require more frequent SSD data access. In k-mer  
242 analysis of huge raw datasets, buffered MQF can be used initially to filter out the low abundant  
243 k-mers (i.e. likely erroneous k-mers), then an in-memory MQF holding the filtered list of k-mers  
244 could be used for subsequent application requiring frequent random queries. This allows  
245 multistage analyses where a first pass eliminates likely errors (17–20).

246

247 CMS is commonly used for online or streaming applications as long as their high error  
248 rate can be tolerated (21). MQF has a better memory footprint in the approximate mode for  
249 lower error rates and thus can compute with CMS for online applications. A major advantage of  
250 quotient filters compared to CMS is the dynamic resizing ability in response to the growing input  
251 dataset (4). The buffered version of MQF can be very useful when the required memory is still  
252 bigger than the available RAM. We should, however, notice that online applications on MQF  
253 cannot make use of the memory optimization that could be achieved with an initial estimation of  
254 the filter parameters. A new version of the Khmer software that replaces CMS with MQF proves  
255 the new data structure more efficient in real-life applications. The MQF version is faster than the  
256 one with CMS unless the target FPR is high. Also, MQF is always more accurate than CMS  
257 although both structures have the same FPR. This behavior of CMS is due to the high error  
258 bound of its counts.

259

260 MQF comes with a novel labeling system that supports associating each k-mer with  
261 multiple values. There are two types of labels: Internal labels adjacent to each item to achieve  
262 the best cache locality but has a fixed size and thus practically useful when a small size label is  
263 needed. The second labeling system is to label the k-mers with one or more labels stored in  
264 external arrays while using the k-mer order in the MQF as an index. External labeling is very  
265 memory efficient mimicking the idea of the minimal perfect hash function (MPHF) (10,11).

266 MPHF undoubtedly has the least memory requirement of all the associative data structures (11).  
267 However, MQF has better performance in both the construction and query phases. For  
268 construction, both structures require initial k-mer counting. MQF needs just an extra  $O(N)$   
269 operation to update the block labels where  $N$  is the number of its unique k-mers. MPHF has to  
270 read then rehash the list of unique k-mers possibly more than once which makes it slower than  
271 MQF. For query operations, MQF is 10x faster regardless of the load factor of MQF  
272 (supplementary figure 2).

273           Furthermore, MQF offers more functionality and has fewer limitations than MPHF. MQF  
274 is capable of labeling a subset of its items which saves significant space for many applications.  
275 For example, k-mer analysis applications may want to only label the frequent k-mers, as an  
276 intermediate solution between pruning all the infrequent k-mers and labeling all the k-mers.  
277 Moreover, MQF allows online insertions and deletions of items as well as merging of multiple  
278 labeled MQFs (See the methods) while MPHF - which doesn't store the items - needs to be  
279 rebuilt over the whole dataset, which requires reading and rehashing the datasets. Furthermore,  
280 MQF can be exact, while MPHF has false positives when queried with novel items that don't  
281 belong to the indexed dataset.

## 282 Conclusions

283           MQF is a new counting quotient filter with a simplified encoding scheme and an efficient  
284 labeling system. MQF adapts well to a wide range of k-mer datasets to be more memory and  
285 time-efficient than its predecessor in many situations. A buffered version of MQF has a fast  
286 insertion algorithm while storing most of the structure on external memory. MQF combines a  
287 fast access labeling system with MPHF-like associative functionality. MQF performance,  
288 features, and extensibility make it a good fit for many online algorithms of sequence analysis.  
289

## 290 Methods

291

292 **MQF Data structure:** MQF has a similar structure to CQF with a different scheme of metadata  
293 that enables different counting and labeling systems (Figure 4). Like the CQF, the MQF requires  
294 2 parameters,  $r$  and  $q$ , and creates an array of  $2^q$  slots; each slot has  $r$ -bits. In Q MQF,  $Q_i$  is the  
295 slot at position  $i$  where  $i = 1 \dots 2^q$ . The MQF maintains the block design of CQF where each  
296 block has 64 slots with their metadata and one extra byte of metadata called *Offset* to enhance  
297 the query of items(4). Both MQF and CQF have two metadata bits to accompany each slot:  
298  $isRunEnd_i$  and  $isOccupied_i$ . In the MQF, each slot  $i$  has extra metadata, a fixed-size counter  
299 with a value ( $F_i$ ) and a configurable size ( $F_{size}$ ). There are also two optional fixed-size parts of  
300 metadata allocated to allow different styles of labeling. Every slot has specific labeling ( $ST_i$ ) with  
301 a configurable size ( $ST_{size} \geq 0$ ), and every block ( $j$ ) has an optional space of a configurable size  
302 designed to store the number of items in the previous blocks.

303

304 The MQF uses the same insertion/query algorithm of CQF (4). In brief, suppose item  $l$ ,  
305 repeated  $c$  times, is to be inserted into  $Q$ . A hash function  $H$  is applied to  $l$  to generate a  $p$ -bit  
306 fingerprint ( $H(l)$ ).  $H(l)$  value is split into two parts, a quotient and remainder. The quotient ( $q_i$ ) is  
307 the most significant  $q$  bits while the remainder ( $r_i$ ) is the remaining least significant  $r$  bits. The  
308 filters store  $r_i$  in a slot  $Q_j$  where  $j \geq q_i$ . One or more slots can be used to store the count of the  
309 same item. If the required slots for the item or its count are not free, all the consecutive  
310 occupied slots starting from this position will be shifted to free the required space. All items  
311 having the same  $q$  are stored into consecutive slots and are called a run. Items in the run are  
312 sorted by  $r_i$ , and  $isRunEnd$  of the last slot in the run is set to one.  $isOccupied(q_i)$  is set to one if

313 and only if there is a run for  $q_i$ . Therefore, there is one bit set to one in each *isOccupied* and  
 314 *isRunEnd* for each run. To query item  $l$ , a Rank and Select method is applied on the metadata  
 315 arrays to get the run start and end for  $q_i$ . Then all the items in the run are searched linearly for  
 316 the slot containing  $r_i$ . The subsequent one or more slots can be decoded to get the count of  
 317 item  $l$ . CQF uses a special encoding scheme to recognize these counting slots but MQF utilizes  
 318 the fixed-counter metadata element (see below).  
 319

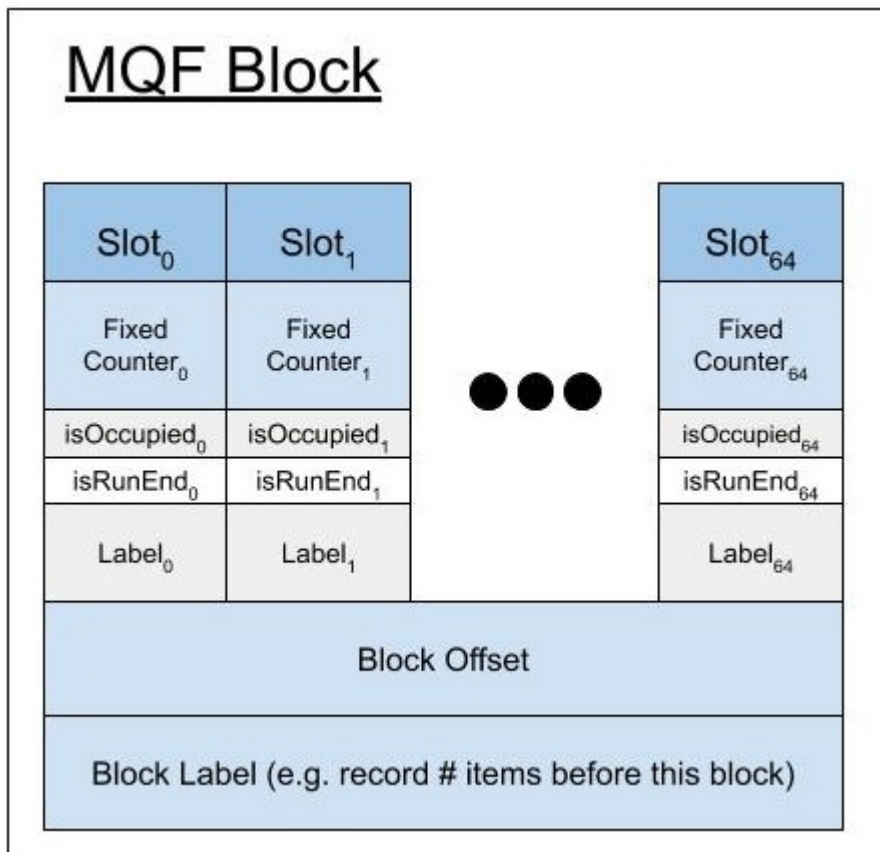

320  
 321 **Figure 4: MQF block structure.** Each MQF block contains 64 slots with their metadata, a one-  
 322 byte block offset, and configurable size space to hold the number of items inserted in the filter  
 323 before the current block. The metadata of each slot consumes  $r$  bits, one bit for each  
 324 *isOccupied* and *isRunEnd* metadata, and configurable  $f$ -bits and  $t$ -bits for the fixed counter and  
 325 the slot-specific label respectively.

326

327 **Counting scheme:** MQF uses two types of counters for storing the values of the count ( $c$ ): A  
328 small fixed-size space ( $F_i$ ) is slot specific and used to store the count of the item in its own slot  
329 if this count is smaller than  $F_{max}$ , where  $F_{max}$  is the maximum possible value for the fixed space.  
330 A variable size space ( $V_i$ ) is composed of one or more slots next to the item's slot and is used  
331 to store larger values. For an item with high count  $c$ , the number of required slots for  $V_i$  is

332 calculated as  $\frac{\log_2(c - F_{max}) - F_{sizes}}{r}$  slots. The  $F_i$  spaces of this item's slot and its  $V_i$  slots are

333 used to mark the last slot for the item where all of them will be saturated to  $F_{max}$  except the last  
334 one (Figure 5). This counting scheme can be summarized into 2 rules:

335 *Rule 1:* MQF requires  $F_i < F_{max}$  if and only if  $i$  is the index of the item's last slot.

336 *Rule 2:* If  $c < F_{max}$ ,  $c$  is stored in  $F_i$  only. Otherwise,  $c - F_{max}$  is stored in  $V_i$

337

338 In comparison to the CQF, the MQF does not use special slots to resolve ambiguities, which is  
339 more memory efficient. The counter encoding algorithm is described in Supplementary Figure 3.

340



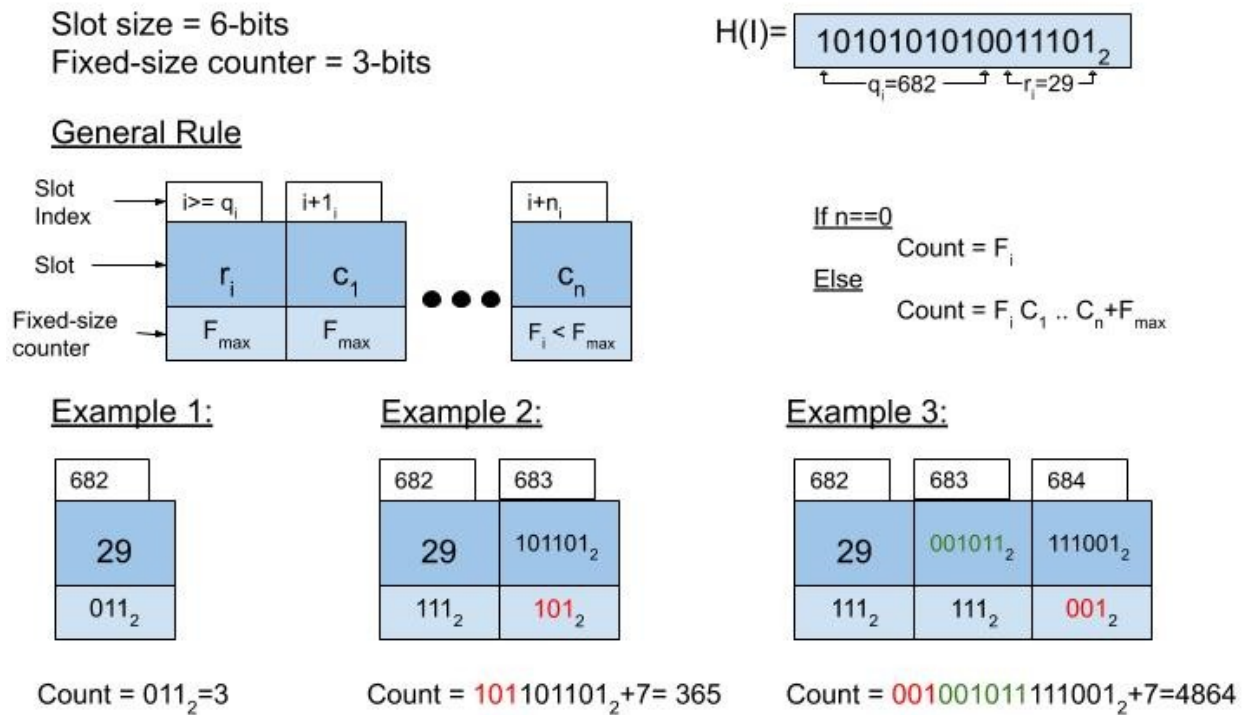

341

342 **Figure 5: MQF counters encoding scheme.** Items and their counts are stored in  $n$  slots and  $n$   
 343 fixed counter as shown in the general rule. Each example stores the same item but different  
 344 count (count = 3, 365, or 4864).

345

## 346 Parameter Estimation

347 For offline counting applications, the MQF parameters ( $q$ ,  $r$ ,  $F_{\text{size}}$ ) can be even more  
 348 optimized for each dataset to create the most memory-efficient filter that has enough slots to fit  
 349 all unique items and their counts. The  $q$  parameter defines the number of slots ( $N$ ) in MQF  
 350 where  $q = \log_2(N)$ . The required numbers of slots for items and their count can be estimated from  
 351 the cardinality of the target dataset, as with CQF. The  $r$  parameter is calculated from the  
 352 equation  $r = p - q$  where  $p$  is the total number of hash-bits used to represent each item. In the  
 353 exact mode,  $p$  equals the exact output of a reversible hash function. In the inexact mode,  $p$  is

354 controlled by the target FPR ( $\delta$ ) according to the equation  $p = \log_2 \frac{N}{\delta}$  described before (4). The  
355  $F_{\text{size}}$  parameter defines the size of the fixed-size counter. This is critical because if a given MQF  
356 has too few slots for items in a dataset, the bigger MQF would have to double the number of  
357 slots causing a big jump in the memory requirement. To avoid that jump, MQF can use larger  
358 fixed size counters to decrease the number of slots required in counting on the expense of a  
359 slight increase in the slot size.

360

### 361 **Labeling System:**

362 MQF can map each item to its count as well as other values, which we call “labels”.  
363 Labels in MQF have two different systems. An internal labeling system stores the associated  
364 value for every key in the data structure, like a hash table. This label has a fixed size defined at  
365 the initialization of the MQF and is practically useful when a small size label is needed (e.g. one  
366 or two bits). The second labeling system labels the block. We use this label to store the number  
367 of items inserted in the MQF before each block. This enables labeling the items of the filter by  
368 separate arrays matching the order of the items in the filter, a behavior that can act as a minimal  
369 perfect hash function (11). The naive way to compute the items’ order is to find the item in the  
370 MQF and iterate backward until the beginning of the filter to count the number of the preceding  
371 items, which is an  $O(N)$  operation. The MQF stores the number of items that exist before each  
372 block; therefore, the MQF iterates only to the beginning of each block, which is an  $O(1)$   
373 operation. The number of previous items for each block is computed after the MQF is  
374 constructed. Any additional insertions or deletions of items would only require re-calculation of  
375 the block label values with no need to re-analyze the original data. Moreover, labeled MQFs can  
376 be updated by merging multiple labeled MQFs and their external labeling arrays. External label  
377 arrays need to be merged after merging the labeled MQFs. To do so, the new items’ order is

378 recomputed in the final MQF. Then, labels in the input external arrays can be copied into a new  
379 external array according to the new item order. Such a function has to consider resolving the  
380 conflicts of items happening in multiple-input MQF and labeled by different external labels  
381 (Figure 6).  
382

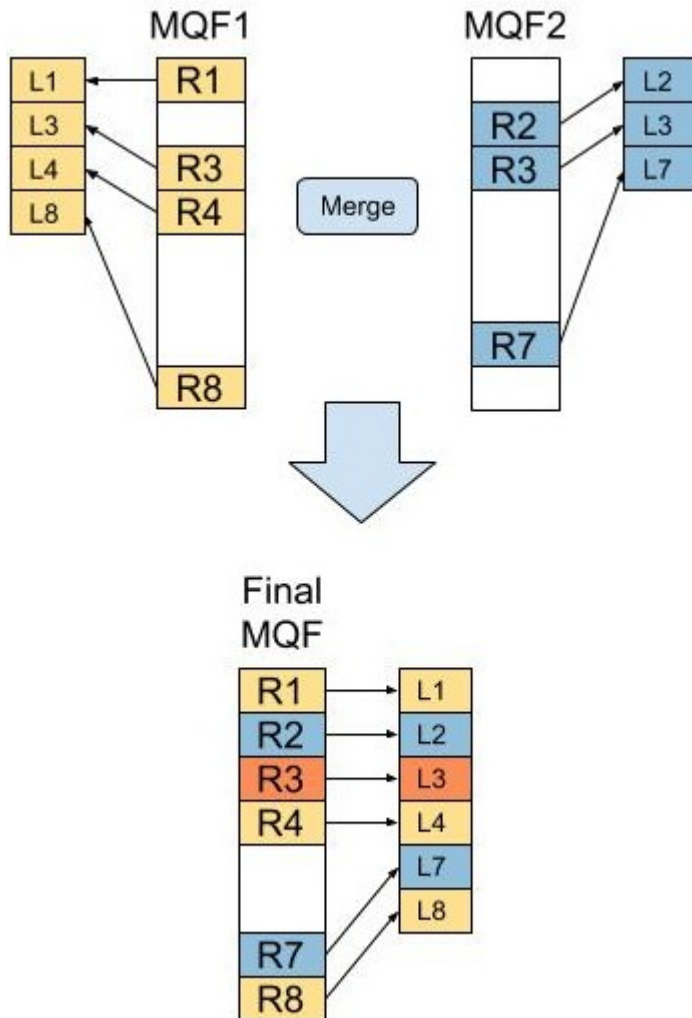

383

384 **Figure 6: Merging MQFs with external labels.**  $R_i$  is the remaining part of item  $i$ , and  $T_i$  is the  
385 external label of the item. Merging the input MQF produces a final MQF with a new order of its  
386 member items. All labels in the input external arrays are copied into a new external array  
387 according to this new order of the items. However, the implementation of the merge function has  
388 to resolve the conflict of R3 labels which exist in both input structures with two labels.

## 389 **Buffered MQF**

390           The Buffered MQF is composed of two MQF structures: a big structure stored on SSD  
391 called onDiskMQF, and an insertion buffer stored in the main memory called bufferMQF.  
392 OnDiskMQF uses stxxl vectors(22) because of the performance of their asynchronous IO. The  
393 bufferMQF is used to limit the number of accesses on the OnDiskMQF and change the access  
394 pattern to the on-disk structure from random to sequential. As shown in the insertion algorithm  
395 in Figure 7, all the insertions are done first on bufferMQF; when it is full, the items are copied  
396 from bufferMQF to OnDiskMQF, and bufferMQF is cleared. The copy operation edits the  
397 onDiskMQF in a serial pattern which is preferred while working on SSD because many edits will  
398 be grouped together in one read/write operation. Figure 8 shows the query algorithm. The  
399 queried items are inserted first to temporary MQF and sequential access is done to query the  
400 items from the OnDiskMQF. The final count is the sum of the bufferMQF and the ondiskMQF.  
401

---

### Algorithm 2 Buffered MQF Insertion

---

```
1: procedure INSERT(onDiskMQF, bufferMQF, item)  
2:   mqf_insert(bufferMQF, item)  
3:   if mqf_space(bufferMQF) > 90 then  
4:     for all  $i \in \text{bufferMQF}$  do  
5:       mqf_insert(bufferMQF, i)  
6:     end for  
7:     mqf_clear(bufferMQF)  
8:   end if  
9: end procedure
```

---

402

403 **Figure 7: Buffered MQF insertion algorithm.** Insertion Algorithm for inserting items in the  
404 Buffered MQF. It inserts the item in the in-memory data structure. The on-memory structure is  
405 merged into the on-disk structure when it is filled.

406

---

### Algorithm 3 Buffered MQF Query

---

```
1: procedure QUERY(onDiskMQF, bufferMQF, list_item)
2:   for all  $i \in listItems$  do
3:     mqf_insert(tmpMQF,  $i$ )
4:   end for
5:   for all  $i \in tmpMQF$  do
6:      $counts[i] \leftarrow mqf\_query(onDiskMQF, i)$ 
7:      $counts[i] \leftarrow counts[i] + mqf\_query(bufferMQF, i)$ 
8:   end for
9:   return counts
10: end procedure
```

407

408 **Figure 8: Buffered MQF query algorithm.** Query algorithm for retrieving counts for a list of  
409 items in the Buffered MQF. First, insert all the items in the list into a temporary MQF. Second,  
410 iterate over the list of items in the temporary MQF and query both the in-memory and on-disk  
411 structures.

412

### 413 Experimental Setup of Benchmarking

414 Five datasets were used in the experiments to cover most of the bioinformatics  
415 applications. Three datasets called z2, z3, and z5 were simulated to follow Zipfian distribution  
416 using three different coefficients: 2, 3, and 5 respectively. The bigger the coefficient the more  
417 singletons in the dataset (23). A fourth dataset was simulated from a uniform distribution with a  
418 frequency equal to 10. One more dataset, named k-mers, represented real k-mers generated in  
419 the ERR1050075 RNA-seq experiment from humans(24). Experiments were conducted to  
420 compare the performance, memory, and accuracy of MQF with the state-of-the-art counting  
421 structures CQF, CMS, and MPHf. Unless stated otherwise, CQF and MQF used the same  
422 number of slots, and the same slot size while the fixed counter of MQF was set to two. The slot  
423 size was calculated to achieve the target FPR as described in the parameter estimation section  
424 (see Methods). To create comparable CMS, the number of the tables in the sketches was

425 calculated using  $\ln \frac{1}{\delta}$  as described before (12). The table width was calculated by dividing the  
426 MQF size by the number of tables. The MPHf was created using the default options in the  
427 BBhash repo (<https://github.com/rizkg/BBHash>). An Amazon AWS t3.large machine with Ubuntu  
428 Server 18.04 was used to run all the experiments. The instance had 2 VCPUS and 8GB RAM  
429 with a 100GB provisioned IOPS SSD attached for storage. All codes used in the experiments  
430 can be accessed through the MQF GitHub repository ([https://github.com/dib-lab/2020-paper-](https://github.com/dib-lab/2020-paper-mqf-benchmarks)  
431 [mqf-benchmarks](https://github.com/dib-lab/2020-paper-mqf-benchmarks)).

432

## 433 List of abbreviations

- 434 ● MQF: mixed-counters quotient filter.
- 435 ● CQF: counting quotient filter.
- 436 ● FPR: false positive rate.
- 437 ● CMS: count-min sketch.
- 438 ● MPHf: Minimal Perfect Hash Functions

439

## 440 Declarations

### 441 **Ethics approval and consent to participate**

442 Not applicable

### 443 **Consent for publication**

444 Not applicable

## 445 **Availability of data and materials**

446 The datasets used in Benchmarking are available in the “2020-paper-mqf-benchmarks”  
447 repository.

448 <https://github.com/dib-lab/2020-paper-mqf-benchmarks>

## 449 **Competing interests**

450 The authors declare that they have no competing interests

## 451 **Funding**

452 Not applicable

## 453 **Authors' contributions**

454 TAM and MS developed theoretical formalism. MS carried out the implementation and  
455 benchmarking. TAM conceived the original idea and supervised this work. All authors  
456 contributed to the writing of the manuscript.

## 457 **Acknowledgements**

458 Not applicable

459

## 460 **References**

- 461 1. Kolajo T, Daramola O, Adebisi A. Big data stream analysis: a systematic literature review.  
462 *Journal of Big Data*. 2019 Jun 6;6(1):1–30.
- 463 2. Matias Y, Vitter JS, Young NE. Approximate data structures with applications. In:  
464 *Proceedings of the fifth annual ACM-SIAM symposium on Discrete algorithms*. Society for  
465 *Industrial and Applied Mathematics*; 1994. p. 187–94.
- 466 3. Bloom BH. Space/time trade-offs in hash coding with allowable errors. *Commun ACM*.  
467 1970 Jul 1;13(7):422–6.
- 468 4. Pandey P, Bender MA, Johnson R, Patro R. A General-Purpose Counting Filter. In:  
469 *Proceedings of the 2017 ACM International Conference on Management of Data - SIGMOD*  
470 '17 [Internet]. 2017. Available from: <http://dx.doi.org/10.1145/3035918.3035963>
- 471 5. Manekar SC, Sathe SR. A benchmark study of k-mer counting methods for high-throughput  
472 sequencing. *Gigascience* [Internet]. 2018 Dec 1;7(12). Available from:  
473 <http://dx.doi.org/10.1093/gigascience/giy125>

- 474 6. Yu Y, Liu J, Liu X, Zhang Y, Magner E, Lehnert E, et al. SeqOthello: querying RNA-seq  
475 experiments at scale. *Genome Biol.* 2018 Oct 19;19(1):167.
- 476 7. Cormode G, Muthukrishnan S. An Improved Data Stream Summary: The Count-Min Sketch  
477 and Its Applications. In: Farach-Colton M, editor. *LATIN 2004: Theoretical Informatics.*  
478 Berlin, Heidelberg: Springer Berlin Heidelberg; 2004. p. 29–38. (Goos G, Hartmanis J, van  
479 Leeuwen J, editors. *Lecture Notes in Computer Science*; vol. 2976).
- 480 8. Muggli MD, Bowe A, Noyes NR, Morley PS, Belk KE, Raymond R, et al. Succinct colored  
481 de Bruijn graphs. *Bioinformatics.* 2017 Oct 15;33(20):3181–7.
- 482 9. Cormen TH, Leiserson CE, Rivest RL, Stein C. *Introduction to Algorithms.* MIT Press; 2009.  
483 1292 p.
- 484 10. Belazzougui D, Botelho FC, Dietzfelbinger M. Hash, Displace, and Compress. In: Fiat A,  
485 Sanders P, editors. *Algorithms - ESA 2009.* Berlin, Heidelberg: Springer Berlin Heidelberg;  
486 2009. p. 682–93. (*Lecture Notes in Computer Science*; vol. 5757).
- 487 11. Limasset A, Rizk G, Chikhi R, Peterlongo P. Fast and scalable minimal perfect hashing for  
488 massive key sets [Internet]. *arXiv [cs.DS]*. 2017. Available from:  
489 <http://arxiv.org/abs/1702.03154>
- 490 12. Cormode G, Muthukrishnan S. An improved data stream summary: the count-min sketch  
491 and its applications. *J Algorithm Comput Technol.* 2005;55(1):58–75.
- 492 13. Crusoe MR, Alameldin HF, Awad S, Boucher E, Caldwell A, Cartwright R, et al. The khmer  
493 software package: enabling efficient nucleotide sequence analysis. *F1000Res* [Internet].  
494 2015 Sep 25 [cited 2019 Jun 3];4. Available from: [https://f1000research.com/articles/4-900/](https://f1000research.com/articles/4-900/v1/pdf)  
495 [v1/pdf](https://f1000research.com/articles/4-900/v1/pdf)
- 496 14. Zook JM, Salit M. Genomes in a bottle: creating standard reference materials for genomic  
497 variation - why, what and how? *Genome Biol.* 2011 Sep 19;12(1):P31.
- 498 15. Flajolet P, Fusy É, Gandouet O, Meunier F. Hyperloglog: The analysis of a near-optimal  
499 cardinality estimation algorithm. In: *IN AOFA '07: PROCEEDINGS OF THE 2007*  
500 *INTERNATIONAL CONFERENCE ON ANALYSIS OF ALGORITHMS* [Internet]. 2007 [cited  
501 2018 Nov 19]. Available from: [http://citeseerx.ist.psu.edu/viewdoc/summary?](http://citeseerx.ist.psu.edu/viewdoc/summary?doi=10.1.1.76.4286)  
502 [doi=10.1.1.76.4286](http://citeseerx.ist.psu.edu/viewdoc/summary?doi=10.1.1.76.4286)
- 503 16. Mohamadi H, Khan H, Birol I. ntCard: a streaming algorithm for cardinality estimation in  
504 genomics data. *Bioinformatics.* 2017 May 1;33(9):1324–30.
- 505 17. Ondov BD, Treangen TJ, Melsted P, Mallonee AB, Bergman NH, Koren S, et al. Mash: fast  
506 genome and metagenome distance estimation using MinHash. *Genome Biol.* 2016 Jun  
507 20;17(1):132.
- 508 18. Chikhi R, Limasset A, Medvedev P. Compacting de Bruijn graphs from sequencing data  
509 quickly and in low memory. *Bioinformatics.* 2016 Jun 15;32(12):i201–8.
- 510 19. Zhang Q, Awad S, Titus Brown C. Crossing the streams: a framework for streaming  
511 analysis of short DNA sequencing reads [Internet]. *PeerJ PrePrints*; 2015 Mar [cited 2020  
512 Jul 23]. Report No.: e1100. Available from: <https://peerj.com/preprints/890/>



- 513 20. Titus Brown C, Howe A, Zhang Q, Pyrkosz AB, Brom TH. A Reference-Free Algorithm for  
514 Computational Normalization of Shotgun Sequencing Data [Internet]. arXiv [q-bio.GN].  
515 2012. Available from: <http://arxiv.org/abs/1203.4802>
- 516 21. Muthukrishnan S. Data Streams: Algorithms and Applications. TCS. 2005 Sep 27;1(2):117–  
517 236.
- 518 22. Dementiev R, Kettner L, Sanders P. Stxxl: Standard Template Library for XXL Data Sets.  
519 In: Algorithms – ESA 2005. Springer, Berlin, Heidelberg; 2005. p. 640–51. (Lecture Notes in  
520 Computer Science).
- 521 23. Powers DMW. Applications and explanations of Zipf's law. In: Proceedings of the Joint  
522 Conferences on New Methods in Language Processing and Computational Natural  
523 Language Learning. Association for Computational Linguistics; 1998. p. 151–60.
- 524 24. Clarke L, Zheng-Bradley X, Smith R, Kulesha E, Xiao C, Toneva I, et al. The 1000  
525 Genomes Project: data management and community access. Nat Methods. 2012 Apr  
526 27;9(5):459–62.

527

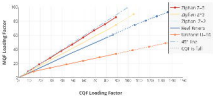

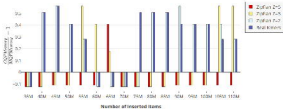

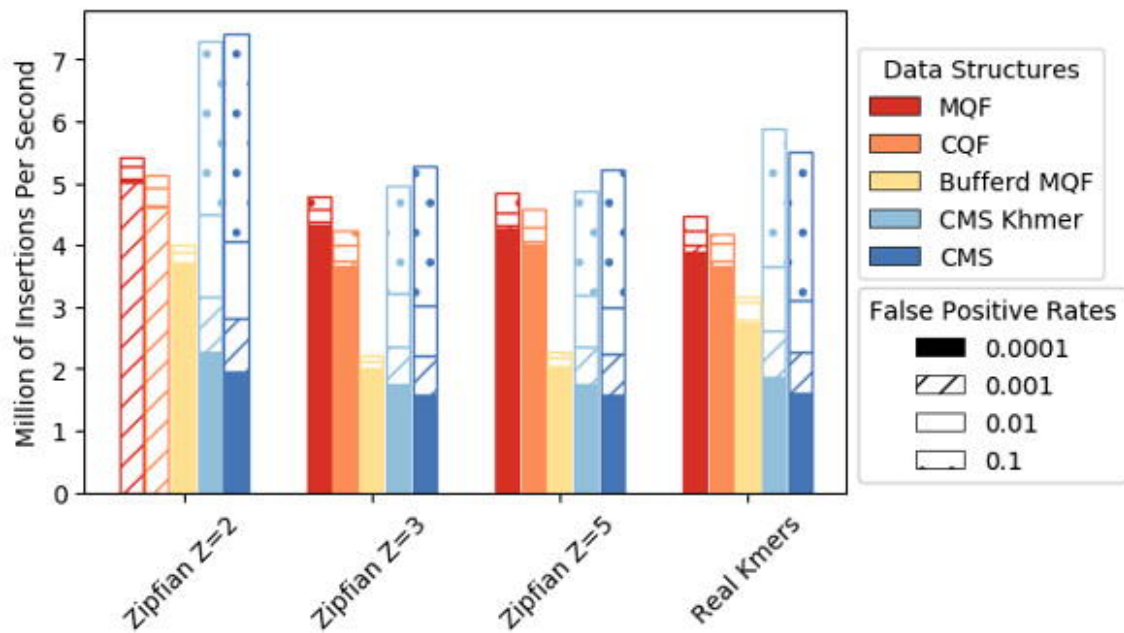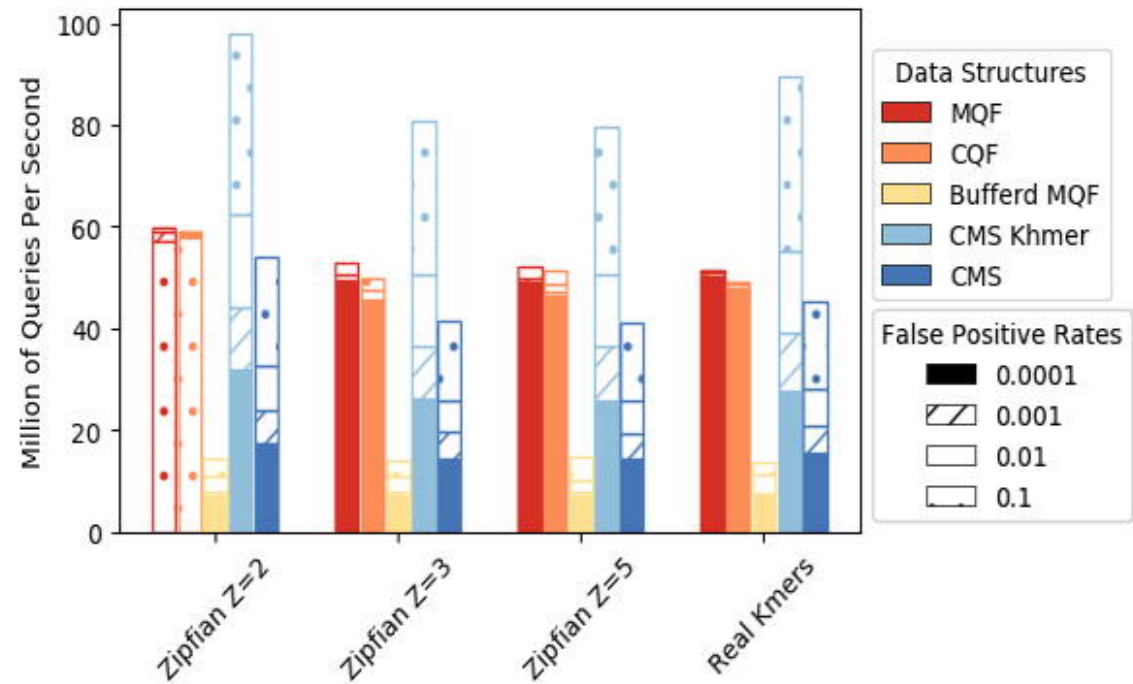

# MQF Block

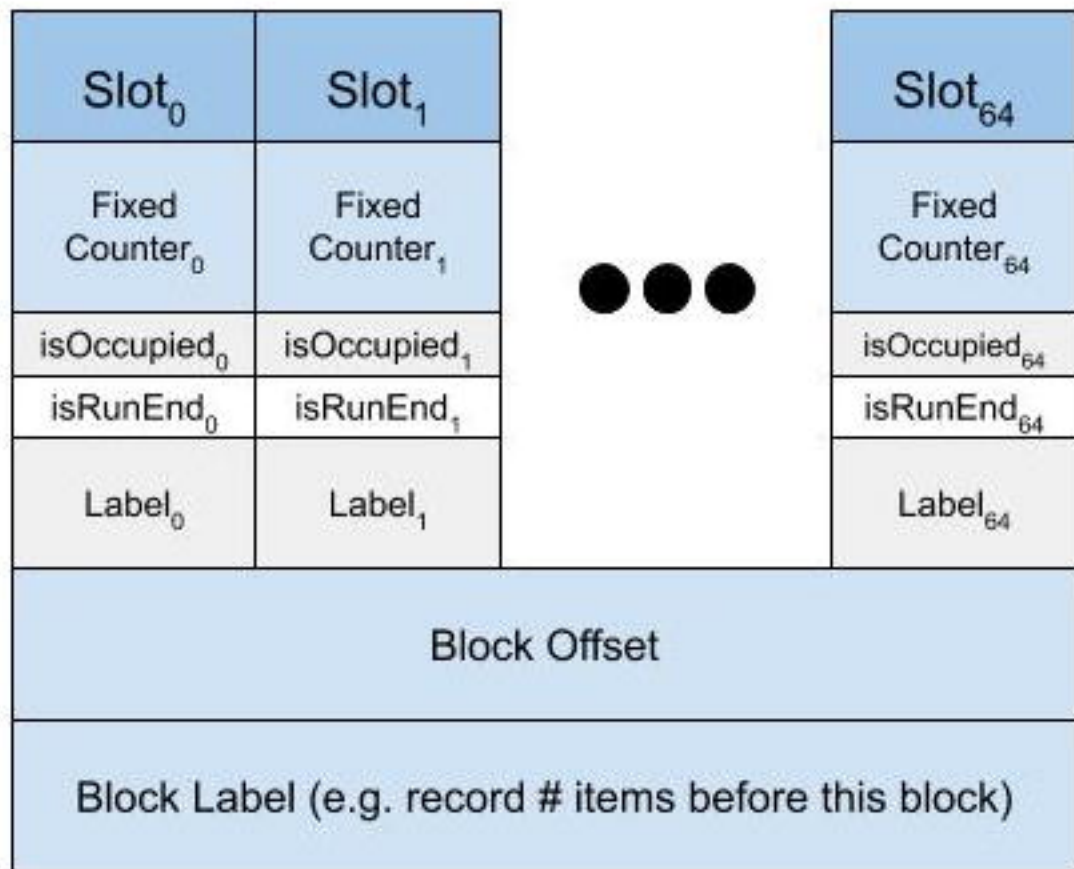

Slot size = 6-bits  
 Fixed-size counter = 3-bits

### General Rule

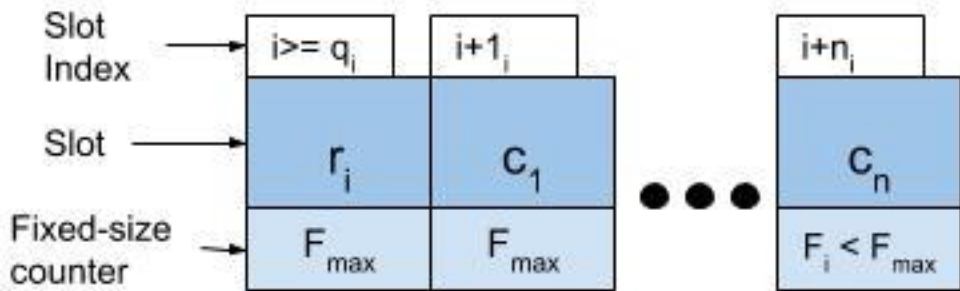

$$H(I) = \boxed{1010101010011101_2}$$

$\leftarrow q_i=682 \rightarrow \quad \leftarrow r_i=29 \rightarrow$

If  $n=0$

$$\text{Count} = F_i$$

Else

$$\text{Count} = F_i C_1 \dots C_n + F_{\max}$$

### Example 1:

|                  |
|------------------|
| 682              |
| 29               |
| 011 <sub>2</sub> |

$$\text{Count} = 011_2 = 3$$

### Example 2:

|                  |                     |
|------------------|---------------------|
| 682              | 683                 |
| 29               | 101101 <sub>2</sub> |
| 111 <sub>2</sub> | 101 <sub>2</sub>    |

$$\text{Count} = 101101101_2 + 7 = 365$$

### Example 3:

|                  |                     |                     |
|------------------|---------------------|---------------------|
| 682              | 683                 | 684                 |
| 29               | 001011 <sub>2</sub> | 111001 <sub>2</sub> |
| 111 <sub>2</sub> | 111 <sub>2</sub>    | 001 <sub>2</sub>    |

$$\text{Count} = 001001011111001_2 + 7 = 4864$$

MQF1

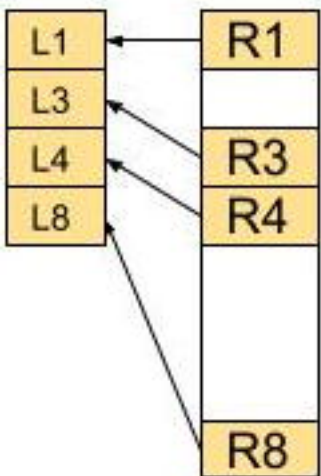

MQF2

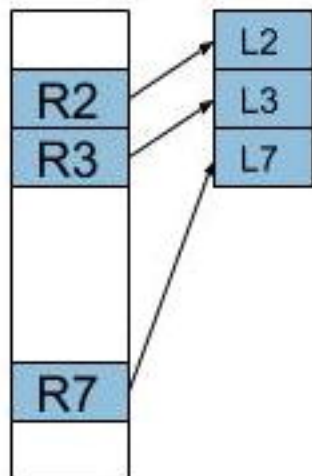

Merge

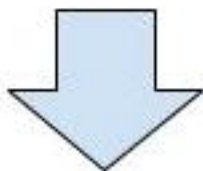

Final  
MQF

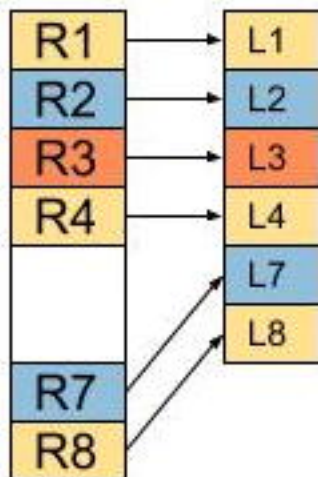

---

**Algorithm 2** Buffered MQF Insertion

---

```
1: procedure INSERT(on Disk MQF, buffer MQF, item)
2:   mqf_insert(buffer MQF, item)
3:   if mqf_space(buffer MQF) > 90 then
4:     for all  $i \in$  buffer MQF do
5:       mqf_insert(buffer MQF, i)
6:     end for
7:     mqf_clear(buffer MQF)
8:   end if
9: end procedure
```

---



---

**Algorithm 3** Buffered MQF Query

---

```
1: procedure QUERY(onDiskMQF, bufForMQF, listItems)
2:   for all  $i \in \text{listItems}$  do
3:     mqf.insert(tmpMQF,  $i$ )
4:   end for
5:   for all  $i \in \text{tmpMQF}$  do
6:     counts[ $i$ ]  $\leftarrow$  mqf.query(onDiskMQF,  $i$ )
7:     counts[ $i$ ]  $\leftarrow$  counts[ $i$ ] + mqf.query(bufForMQF,  $i$ )
8:   end for
9:   return counts
10: end procedure
```

# Size Comparison between MQF and CQF

Real World Cases

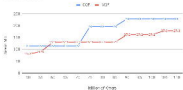

## Query time for 35M items

■ HOP Query Time    ■ HPHH Query Time

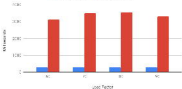

---

**Algorithm 1** Counters Encoder

---

```
1: procedure ENCODE( $Q, r, count, start$ )
2:    $base \leftarrow 2^{Q \cdot r}$  ▷  $Q \cdot r$  is #bits in the slot
3:    $fcountMax \leftarrow 2^{Q \cdot f} - 1$  ▷  $Q \cdot f$  is #bits in the fixed-size counter
4:    $stack \leftarrow \emptyset$ 
5:   while  $count > fcountMax - 1$  do
6:      $stack.push(count \% base)$ 
7:      $count = count \gg Q \cdot r$  ▷ bit shift operation
8:   end while
9:    $stack.push(r)$ 
10:   $i \leftarrow start$ 
11:  while  $stack \neq \emptyset$  do
12:     $Q_{i,r} \leftarrow stack.pop()$  ▷ Slot of index  $i$ 
13:     $Q_{i,f} \leftarrow fcountMax$  ▷ fixed-size counter of index  $i$ 
14:     $i \leftarrow i + 1$ 
15:  end while
16:   $Q_{r,f} \leftarrow count$ 
17: end procedure
```

---
